# Supplementary material for: A Common Anterior Insula Representation of Disgust Observation, Experience and Imagination Shows Divergent Functional Connectivity Pathways
Source: PubMed Central journal article supplement (PMC2491556; doi:10.1371/journal.pone.0002939), 2008-08-13

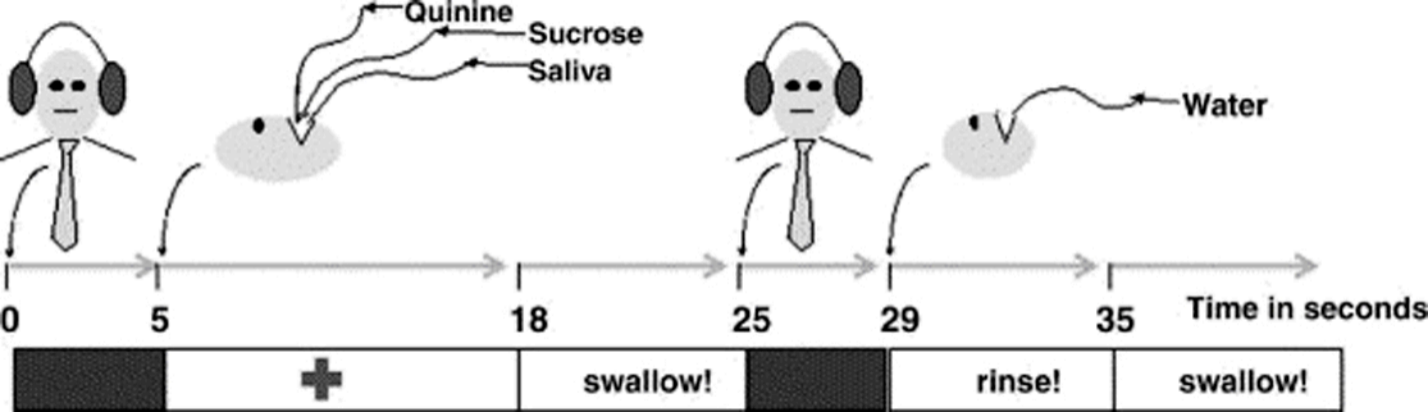

Supplement: pone.0002939.s004.pdf [file pone.0002939.s004.pdf]
