# Supplementary material for: A Common Anterior Insula Representation of Disgust Observation, Experience and Imagination Shows Divergent Functional Connectivity Pathways
Source: PubMed Central journal article supplement (PMC2491556; doi:10.1371/journal.pone.0002939), 2008-08-13
Supplement: pone.0002939.s005.pdf [file pone.0002939.s005.pdf]

# Imagination trial

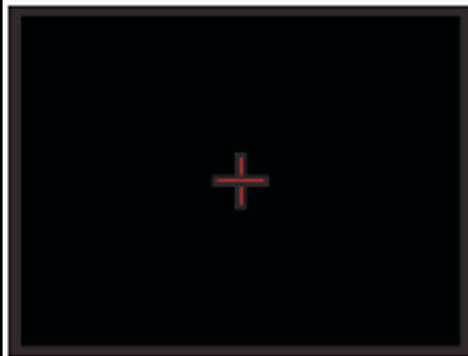

fixation 6s

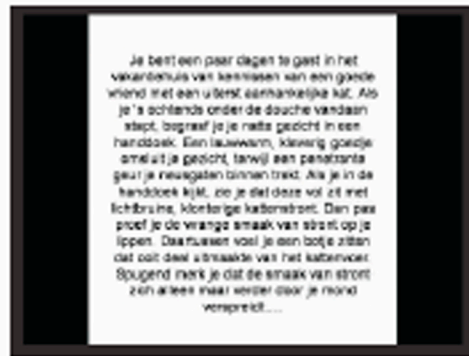

script 35s

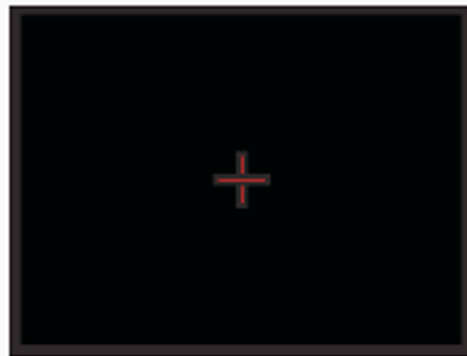

fixation 6s

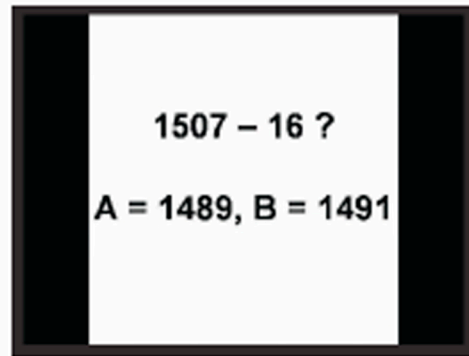

calculation 6s
